# Supplementary material for: The CXCL16-CXCR6 axis in glioblastoma modulates T-cell activity in a spatiotemporal context
Source: Front Immunol. 2024 Jan 17;14:1331287. doi: 10.3389/fimmu.2023.1331287 (PMC10827847; doi:10.3389/fimmu.2023.1331287)
Supplement: Supplementary file 8 [file Table_2.xlsx]

## Sheet: Sheet1
Antibodies	Conjugate	Clone	SOURCE	IDENTIFIER
Mouse Anti-CD16/32	None	93	Biolegend	RRID:AB_312800
Mouse Anti-CD45	BV510	30-F11	Biolegend	RRID:AB_2561392
Mouse Anti-CD3	PE-Cy7	17A2	Biolegend	RRID:AB_1732068
Mouse Anti-C11b	BV711	M1/70	Biolegend	RRID:AB_11218791
Mouse Anti-Ly6C	Alexa-Fluor 700	HK1.4	BD Biosciences	RRID:AB_10612017
Mouse Anti-Ly6G	Percp–cy5.5	1A8	Biolegend	RRID:AB_1877272
Mouse Anti-CD4	BUV395	GK1.5	BD Biosciences	RRID:AB_2739427
Mouse Anti-CD8	BV605	53-6.7	Biolegend	RRID:AB_2561352
Mouse Anti-Foxp3	Efluor 450	Fjk16s	Fisher	RRID:AB_1518812
Mouse Anti-CD44	Percp Cy5.5	IM7	Biolegend	RRID:AB_2076206
Mouse Anti-CD62L	BV711	MEL-14	Biolegend	RRID:AB_2564215
Mouse Anti-TNFα	BV421	MP6-XT22	Biolegend	RRID:AB_10900823
Mouse Anti-GzmB	Alexa 647	GB11	Biolegend	RRID:AB_2294995
Mouse Anti-IFNγ	Alexa 700	XMG1.2	Biolegend	RRID:AB_2561300
Mouse Anti-CXCL16	PE	12-81	BD Biosciences	RRID:AB_2869842
Mouse Anti-CXCR6	PE	DANID2	Fisher	RRID:AB_2734902
Mouse Anti-PDL1	PECy7	10F.9G2	Biolegend	RRID:AB_10643573
Mouse Anti-PD1	FITC	J43	Ebioscience	RRID:AB_465472
Mouse Anti-Tim3	PeCy7	B8.2C12	Biolegend	RRID:AB_2632734
Mouse Anti-Lag3	APC	C9B7W	Biolegend	RRID:AB_10639935
